# Supplementary material
Source: publisher figshare collection journal article supplement (https://aacr.figshare.com/articles/dataset/_/23391299)
Supplement: Supplementary file 1 [file 41119898]

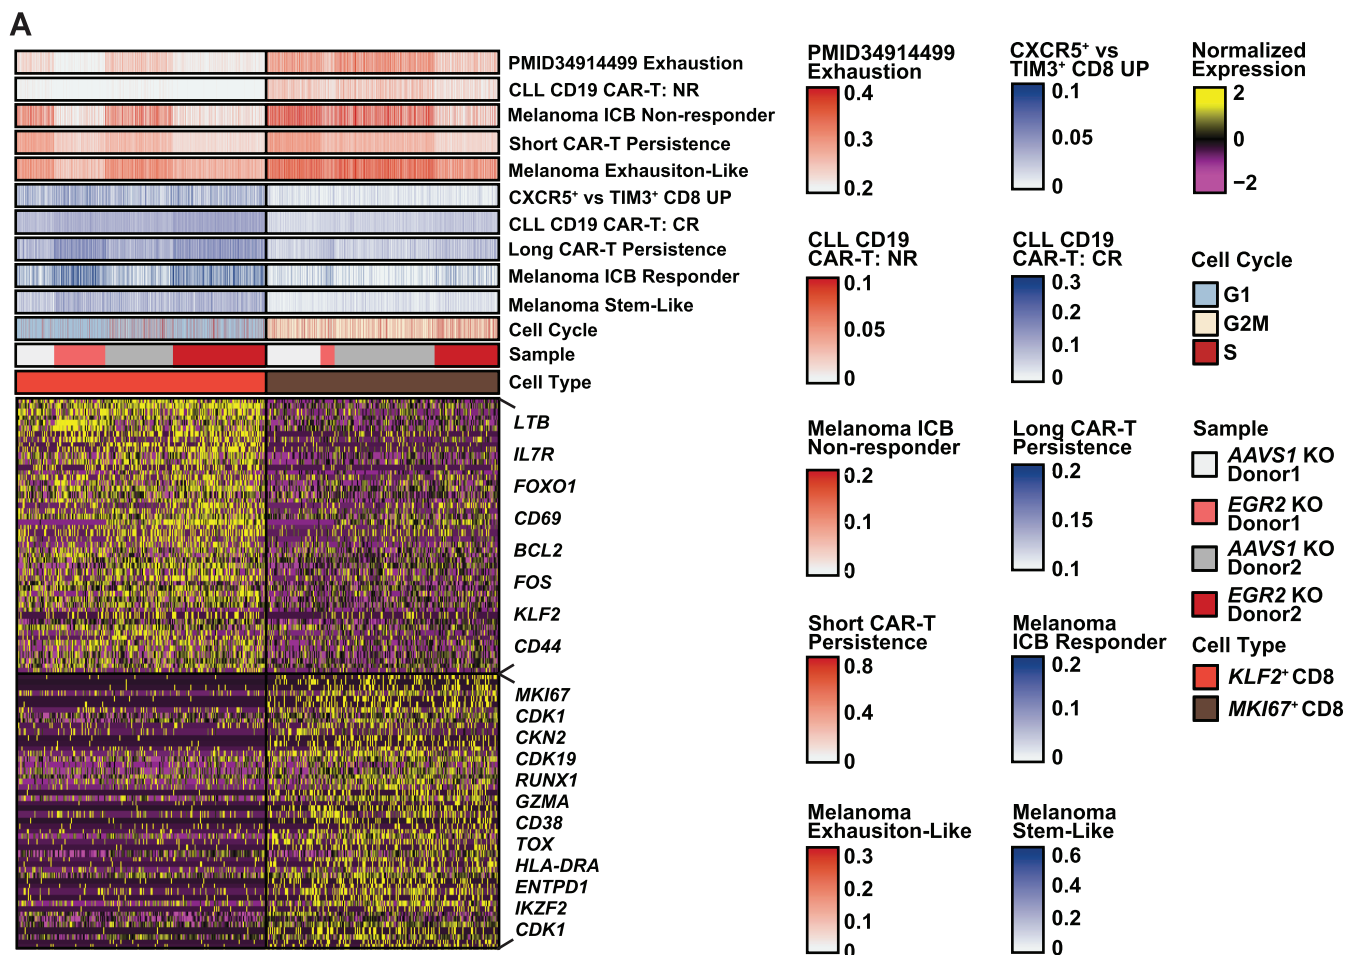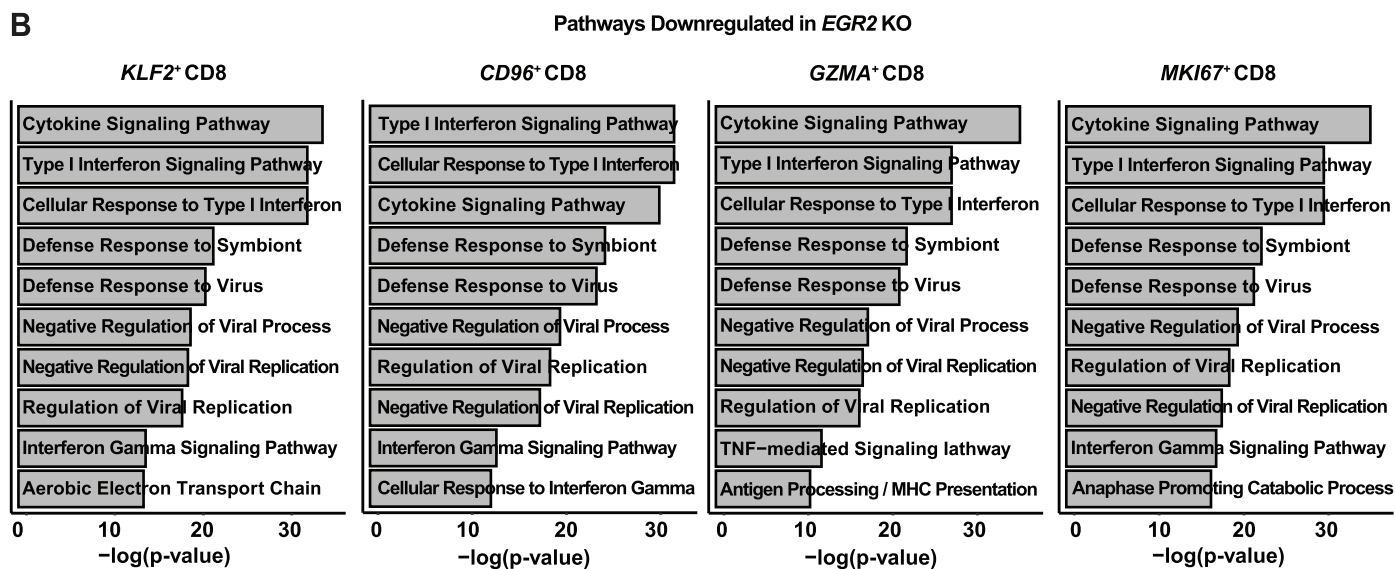

**Supplementary Figure 5. Gene expression and pathway enrichment analysis of CD8<sup>+</sup> T cell clusters.** **A**, Heatmap showing differentially expressed genes between memory-like *KLF2*<sup>+</sup> and exhausted-like *MKI67*<sup>+</sup> CD8<sup>+</sup> T-cells. Gene signature scores related to cell cycle and clinical response are indicated on the top bars. **B**, Top downregulated GO biological processes in *EGR2* compared to *AAVS1* knockout CAR T-cells.
